# Supplementary material for: Characterization of a new oxidant-stable serine protease isolated by functional metagenomics
Source: Springerplus. 2013 Aug 28;2:410. doi: 10.1186/2193-1801-2-410 (PMC3765597; doi:10.1186/2193-1801-2-410)
Supplement: Supplementary file 1 — Additional file 1: Caseinolytic activity ofE. coliRosetta cells overproducing the full-length protease SBcas3.3 or one of its truncated mutants, cas516 or cas560. (PDF 30 KB) [file 40064_2013_479_MOESM1_ESM.pdf]

**Additional file 1. Caseinolytic activity of *E. coli* Rosetta cells overproducing the full-length protease SBcas3.3 or one of its truncated mutants, cas516 or cas560.**

Activity was measured with 1 g/l AZCL-casein substrate from Megazyme added to agar plates (whole cells) or to total cell extracts (grown at various temperatures) diluted twice in 0.1 M Tris-HCl pH 9. For the tests on agar plates, the bacteria were first allowed to grow at 37°C for 16 h before transfer to incubators set at various temperatures (4, 22, 29, 37, and 50°C). 10 µM IPTG was used for induction.

[illegible]
